## Risk of incident SARS-CoV-2 infection among healthcare workers in Egyptian quarantine hospitals

*Sofía Jijón<sup>1,2†</sup>, Ahmad Al Shafie<sup>3†</sup>, Laura Temime<sup>1,2</sup>, Kévin Jean<sup>1,2,4\*</sup>, Mohamed El Kassas<sup>3\*</sup> and the EMEA-MESuRS working group on nosocomial SARS-CoV-2 modelling.*

<sup>1</sup> Laboratoire MESuRS, Conservatoire national des Arts et Métiers, Paris, France

<sup>2</sup> Unité PACRI, Institut Pasteur, Conservatoire national des Arts et Métiers, Paris, France

<sup>3</sup> Endemic Medicine Department, Faculty of Medicine, Helwan University, Cairo, Egypt

<sup>4</sup>MRC Centre for Global Infectious Disease Analysis, Department of Infectious Disease Epidemiology, Imperial College London, United Kingdom

*† Contributed equally to the work*

*\*Contributed equally to the work*

**Corresponding author:** [kevin.jean@lecnam.net](mailto:kevin.jean@lecnam.net)

[Comment \(655 words\)](#)

### ABSTRACT

In response to the Covid-19 pandemic, Egypt adopted a unique care model based on quarantine hospitals for Covid-19 patients, with dedicated medical teams residing in the hospital days and nights during working shifts. However, the impact of this approach on the infection risk for healthcare workers (HCWs) is uncertain.

Based on data collected within two quarantine hospitals located in Cairo, Egypt, we compute the incidence of SARS-CoV-2 infection in health-care workers (HCWs) using a model-based approach that accounts for variability in false-negative rates of RT-PCR tests. We estimate the probability for an HCW to be infected at the end of a working shift at 12.8% (95% CrI: 7.6%-19.5%) for a 2-week shift at Hospital 1, whereas a higher probability of 48.2% (95%CrI: 23.8%-74.5%) was found for a 7-day shift at Hospital 2.

The large variation in the infection risk we describe between the two hospitals we studied suggests that HCWs from quarantine hospitals may face a high risk of infection, but that, with sufficient anticipation and infection control measures, this risk can be brought down to levels similar to those observed in standard healthcare settings.

## MAIN TEXT

Healthcare settings face multiple challenges related to COVID-19 pandemic. They have to deal with a significant influx of infected patients while controlling the risk of nosocomial spread to other patients and staff. In this regard, Egypt established a unique care model under the World Health Organization supervision, whereby specific hospitals were assigned as quarantine hospitals for COVID-19 patients, with dedicated medical teams residing in the hospital days and nights during working shifts of various lengths.<sup>1</sup> While this strategy has the potential to be highly efficient in terms of patient care, as well as in limiting the potential spread of the virus from hospitals into the community, its impact on the infection risk for healthcare workers (HCWs) is uncertain. Here, we aimed at evaluating this impact in two quarantine hospitals with distinct affiliations.

We collected data within two hospitals located in Cairo, Egypt (hereafter Hosp1 and Hosp2), that were temporarily transformed into quarantine hospitals and dedicated to managing externally-referred COVID-19 confirmed patients. Multidisciplinary medical teams worked in total isolation over 2-week shifts in Hosp1 and 1-week shifts in Hosp2. HCWs were tested using reverse transcription-polymerase chain reaction (RT-PCR): i) routinely at the end of the working shift, ii) upon symptoms, and iii) in case of outbreak suspicion (>2 positive tests among HCWs). HCWs testing negative at the end of the shift were then released for self-isolation at home for another 14 days, while HCWs testing positive, if any, were admitted to the same quarantine hospital for medical care. We used a model-based Bayesian approach to estimate the hospital-specific incidence of diagnosed and undiagnosed SARS-CoV-2 infections in HCWs. The method accounted for the variation in RT-PCR sensitivity with the time since exposure and the right-truncated nature of our data.<sup>2</sup> Further details on study settings or methods are provided in supplementary materials.

Over a total follow-up of 6,601 person-days (PD), 42 SARS-CoV-2 infections were diagnosed among 348 HCWs with no evidence of SARS-CoV-2 antibodies at the start of their shifts (Table 1). We estimated significantly different risk levels between hospitals, with an estimated incidence rate of diagnosed and undiagnosed infections of 0.97 (95% Credible Interval CrI: 0.56–1.53) per 100 PD in Hosp1 and 8.98 per 100 PD (95% CrI: 3.81–17.75) in Hosp2. The probability for an HCW to be infected at the end of a working shift was estimated at 12.8% (95% CrI: 7.6%–19.5%) for a 2-week shift at Hosp1, whereas a higher probability of 48.2% (95%CrI: 23.8%–74.5%) was found for a 7-day shift at Hosp2.

The higher level of risk we reported in Hosp2 may be partly explained by the short period during which it adopted a quarantine organization, which coincided with the country's highest epidemic activity.<sup>3</sup> This may have led to a high proportion of severe and thus highly contagious COVID-19 patients referred to quarantine hospitals together with a higher workload for HCWs. Contrarily, Hosp1 adopted the quarantine organization in mid-March 2020, and thus experienced some weeks of lower epidemic intensity that may have improved preparedness for intense COVID-19 activity. The SARS-CoV-2 infection risk we estimated in Hosp1 was compatible with infection point-prevalence reported in non-quarantine Egyptian hospitals (varying from 4.2% to 14.3%) or incidence reported in front-line HCWs in the UK (13% infection rate after one month).<sup>4–6</sup>

Preventing nosocomial SARS-CoV-2 infection remains an urgent need, especially in settings where preparedness does not match the risk faced by HCWs. The large variation in the infection risk we described between the two hospitals we studied suggested that HCWs from quarantine hospitals may face a high risk of infection, but that, with sufficient anticipation and infection control measures, this risk can be brought down to levels similar to those observed in standard healthcare settings. A comprehensive assessment of the quarantine hospitals care model should

also include its impact on HCWs' mental health as well as the benefits of an early diagnosis of those infected, which is likely to reduce further household and community transmission.<sup>7</sup>

|                                                                                                         | <b>Hospital 1</b>                               | <b>Hospital 2</b>                            |
|---------------------------------------------------------------------------------------------------------|-------------------------------------------------|----------------------------------------------|
| <b>Quarantine organization period</b>                                                                   | March 14 <sup>th</sup> – August 1 <sup>st</sup> | June 6 <sup>th</sup> – July 11 <sup>th</sup> |
| <b>Number of beds</b>                                                                                   | 90–100                                          | 35                                           |
| <b>Mean number of HCWs per shift (min-max)</b>                                                          | 55.5<br>(48–63)                                 | 19.2<br>(16–20)                              |
| <b>Shift duration</b>                                                                                   | 14 days                                         | 7 days                                       |
| <b>Number of PD</b>                                                                                     | 6,097                                           | 504                                          |
| <b>Number of diagnosed SARS-CoV-2 infections</b>                                                        | 28                                              | 14                                           |
| <b>Estimated incidence rate of diagnosed and undiagnosed SARS-CoV-2 infections per 100 PD (95% CrI)</b> | 0.97<br>(0.56–1.53)                             | 8.98<br>(3.81–17.75)                         |
| <b>Probability of being infected over a shift (95% CrI)</b>                                             | 12.8%<br>(7.6%–19.5%)                           | 48.2%<br>(23.8%–74.5%)                       |

**Table 1.** Hospital characteristics and epidemiological indicators for SARS-CoV-2 infections among healthcare workers. Abbreviations: CI = Confidence interval, CrI = Credibility Interval, HCWs = Healthcare workers, PD = person-days.

### **Declaration of interest**

The authors declare no conflicts of interest.

### **Fundings**

This study was supported by INSERM-ANRS (France Recherche Nord and Sud Sida-HIV Hépatites, grant number ANRS-COV-19.).

### **Acknowledgment**

The members of the EMEA-MESuRS working group on nosocomial SARS-CoV-2 modeling are Audrey Duval, Kévin Jean, Sofía Jijón, Ajmal Oodally, Lulla Opatowski, George Shirreff, David RM Smith and Laura Temime.

We thank all the dedicated HCWs who contributed to this study.

### **Ethical approval**

The study was approved by the Research Ethics Committee (REC) of the Central Directorate of Research and Health Development and Reviews at the Egyptian Ministry of Health and Population (Serial: 25-2020/16), and by REC for human subject research at the Faculty of Medicine, Helwan University (Serial: 50-2020).

## REFERENCES

- 1 Medhat MA, El Kassas M. COVID-19 in Egypt: Uncovered figures or a different situation? *J Glob Health*; **10**. DOI:10.7189/jogh.10.010368.
- 2 Kucirka LM, Lauer SA, Laeyendecker O, Boon D, Lessler J. Variation in False-Negative Rate of Reverse Transcriptase Polymerase Chain Reaction–Based SARS-CoV-2 Tests by Time Since Exposure. *Annals of Internal Medicine* 2020; **173**: 262–7.
- 3 Egypt: WHO Coronavirus Disease (COVID-19) Dashboard. <https://covid19.who.int> (accessed Dec 20, 2020).
- 4 Mostafa A, Kandil S, El-Sayed MH, *et al.* Universal COVID-19 screening of 4040 health care workers in a resource-limited setting: an Egyptian pilot model in a university with 12 public hospitals and medical centers. *Int J Epidemiol* 2020. DOI:10.1093/ije/dyaa173.
- 5 Abdelmoniem R, Fouad R, Shawky S, *et al.* SARS-CoV-2 infection among asymptomatic healthcare workers of the emergency department in a tertiary care facility. *J Clin Virol* 2020; **134**: 104710.
- 6 Houlihan CF, Vora N, Byrne T, *et al.* Pandemic peak SARS-CoV-2 infection and seroconversion rates in London frontline health-care workers. *The Lancet* 2020; **0**. DOI:10.1016/S0140-6736(20)31484-7.
- 7 Youssef N, Mostafa A, Ezzat R, Yosef M, El Kassas M. Mental health status of health-care professionals working in quarantine and non-quarantine Egyptian hospitals during the COVID-19 pandemic. *East Mediterr Health J* 2020; **26**: 1155–64.
